# Supplementary material for: Identification and characterization of phosphodiesterases that specifically degrade 3′3′-cyclic GMP-AMP
Source: PubMed Central journal article supplement — Cell Res. 2015 Apr 3;25(5):539–50. doi: 10.1038/cr.2015.40 (PMC4423081; doi:10.1038/cr.2015.40), 2015-04-03
Supplement: cr201540x2.pdf [file cr201540x2.pdf]

**A**

| Uniprot NO. | Ordered Locus Names | Domains        | AA  | Protein MW (KD) |
|-------------|---------------------|----------------|-----|-----------------|
| Q9KRD2      | VC1710              | EAL            | 818 | 92              |
| Q9KYR6      | VC0137              | EAL            | 432 | 51              |
| Q9KN64      | VCA0101             | EAL            | 518 | 59              |
| Q9KSP5      | VC1211              | EAL            | 704 | 79              |
| Q9KRP4      | VC1592              | EAL            | 284 | 32              |
| Q9KQZ6      | VC1851              | EAL HDOD       | 404 | 46              |
| Q9KMV8      | VCA0210             | HD-GYP         | 522 | 60              |
| Q9KPM7      | VC2340              | HD-GYP         | 384 | 44              |
| Q9KSB1      | VC1348              | HD-GYP         | 441 | 49              |
| Q9KU35      | VC0694              | GAF            | 558 | 61              |
| Q9KSG1      | VC1295              | HD-GYP         | 492 | 55              |
| Q9KLI8      | VCA0931             | HD-GYP         | 460 | 51              |
| Q9KPT8      | VC2497              | HD-GYP         | 417 | 47              |
| Q9KSV4      | VC1152              | HDOD           | 311 | 35              |
| Q9KU70      | VC0653              | EAL            | 684 | 78              |
| Q9KM53      | VCA0536             | EAL            | 288 | 32              |
| Q9KMO0      | VCA1083             | EAL            | 235 | 27              |
| Q9KUW1      | VC0398              | EAL            | 673 | 78              |
| Q9KUK3      | VC0515              | EAL HDOD       | 410 | 47              |
| Q9KLS3      | VCA0895             | HD-GYP         | 901 | 112             |
| Q9KLE4      | VCA0802             | Phosphodiester | 657 | 74              |
| Q9KNY0      | VC2600              | Phosphodiester | 622 | 72              |
| Q9KM78      | VCA0510             | Phosphodiester | 968 | 110             |
| Q9KRF5      | VC1687              | DHH            | 301 | 33              |
| Q9KT24      | VC1081              | HD-GYP         | 380 | 43              |
| Q9KT19      | VC1086              | EAL            | 536 | 61              |
| H9L4Q6      | VC1652              | EAL            | 584 | 65              |
| Q9KU65      | VC0658              | EAL            | 685 | 77              |
| Q9KJ9       | VC1641              | EAL            | 257 | 29              |
| Q9KLR1      | VCA0681             | HD-GYP         | 431 | 49              |
| Q9KYR7      | VC0072              | EAL            | 768 | 88              |
| Q9KQR4      | VC1934              | EAL            | 655 | 76              |
| Q9KN01      | VCA0165             | GAF            | 710 | 81              |
| Q9KN95      | VCA0080             | EAL            | 607 | 70              |
| Q9KN18      | VC2750              | EAL            | 849 | 95              |
| Q9KLF9      | VCA0785             | EAL GAF        | 627 | 71              |

**B**

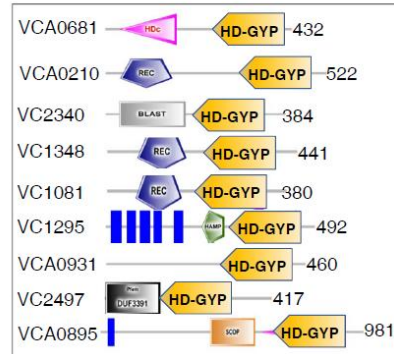

**Figure S2** Identification of cGAMP PDEs of *V. cholerae* (V-cGAPs) that inhibit DncV-induced IRF3 activation.

(A) Summary of PDE candidates tested in this study and indicated detailed information. (B) Illustration of all HD-GYP domain containing proteins in *V. cholerae*.
