# Supplementary material for: Identification and characterization of phosphodiesterases that specifically degrade 3′3′-cyclic GMP-AMP
Source: PubMed Central journal article supplement — Cell Res. 2015 Apr 3;25(5):539–50. doi: 10.1038/cr.2015.40 (PMC4423081; doi:10.1038/cr.2015.40), 2015-04-03
Supplement: cr201540x5.pdf [file cr201540x5.pdf]

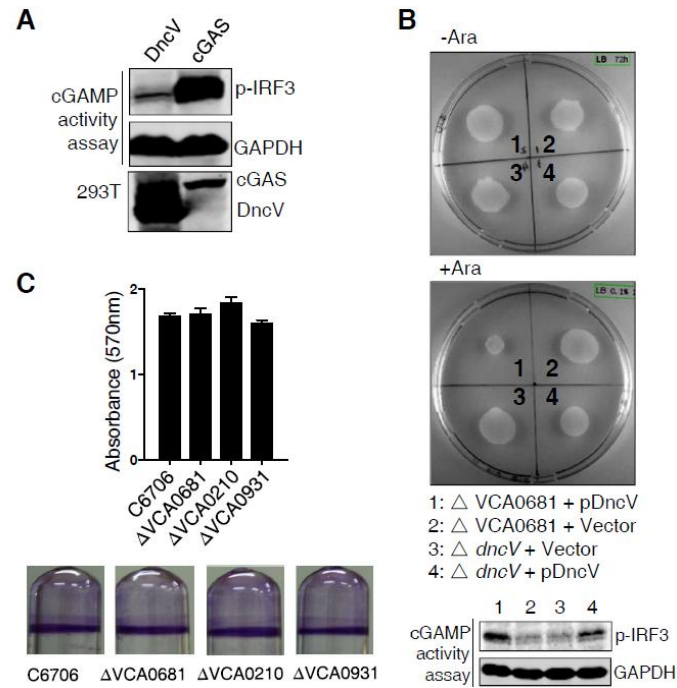

**Figure S5** V-cGAPs regulate bacterial chemotaxis and intestinal colonization *in vivo*.

(A) 293T cells were transfected with DncV or cGAS (bottom). 3'3'-cGAMP (by DncV expression) or 2'3'-cGAMP (by cGAS expression) was isolated from the transfected cells after 24 hours, and cGAMP activity assay was performed in PFO-permeabilized THP-1 cells. (B) Examination of chemotactic behavior (top and center) of *V. cholerae*  $\Delta$ VCA0681 mutant (1 and 2) or  $\Delta$ dncV mutant (3 and 4) expressing arabinose-induced DncV (1 and 4). Bacterial 3'3'-cGAMP was extracted and its activity was measured by cGAMP activity assay (bottom). (C) Measurement of the mean  $A_{570}$  values (top) reflecting crystal violet staining (bottom) of the biofilms formed by *V. cholerae* C6706 WT or indicated  $\Delta$ V-cGAPs mutant strains in glass tube.
